# Supplementary material for: Sensitivity of source sediment fingerprinting to tracer selection methods
Source: Copernicus journal article supplement (doi:10.5194/soil-10-109-2024), 2024-02-13
Supplement: Supplementary file 1 [file soil-10-109-2024-supplement.zip]

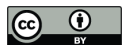

## *Supplement of*

# **Sensitivity of source sediment fingerprinting to tracer selection methods**

**Thomas Chalaux-Clergue et al.**

*Correspondence to:* Thomas Chalaux-Clergue ([thomas.chalaux@lsce.ipsl.fr](mailto:thomas.chalaux@lsce.ipsl.fr)) and Rémi Bizeul ([remi.bizeul@lsce.ipsl.fr](mailto:remi.bizeul@lsce.ipsl.fr))

- [soil-10-109-2024-supplement-title-page.pdf](#)
- [Supplementary\\_materials](#)
  - [Tracer\\_selection\\_TCC.Rmd](#)

The copyright of individual parts of the supplement might differ from the article licence.
